# Supplementary figures and images for: Direct preparation of green and renewable aerogel materials from crude bagasse
Source: Springer Nature journal article supplement (doi:10.1007/s10570-015-0814-9), 2016-01-22

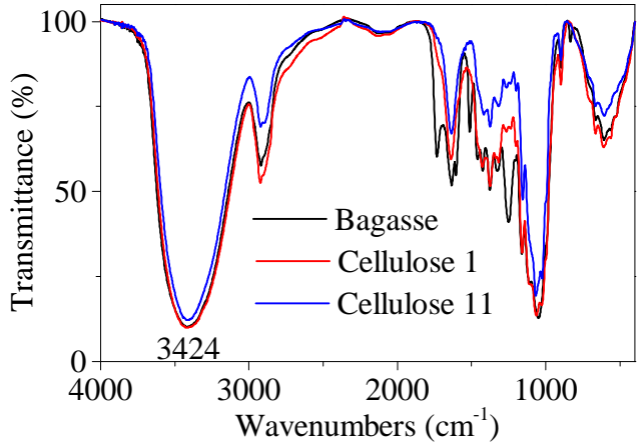

Supplement: MOESM1 [file 7358764]

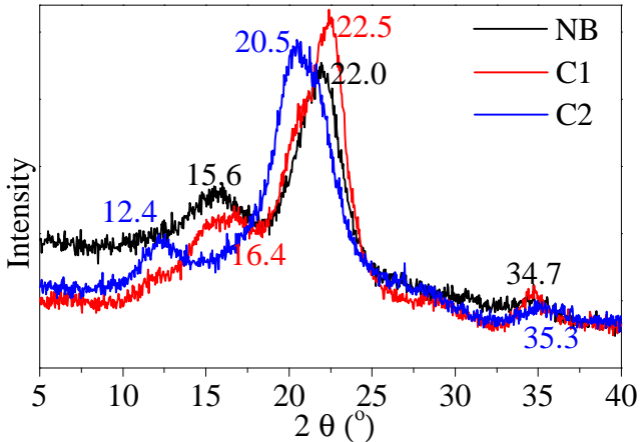

Supplement: MOESM2 [file 7358764]
